# Supplementary material
Source: publisher site journal article supplement (https://www.spandidos-publications.com/7445/downloadSupplementary)

Figure S1. Diagram illustrating the relationship between *DNAH9* mutation sites and phenotypes. No obvious association between the mutation site and phenotype was identified. Red represents congenital heart disease, blue represents asthenozoospermia, green represents respiratory diseases and black represents only situs inversus. *DNAH9*, dynein axonemal heavy chain 9.

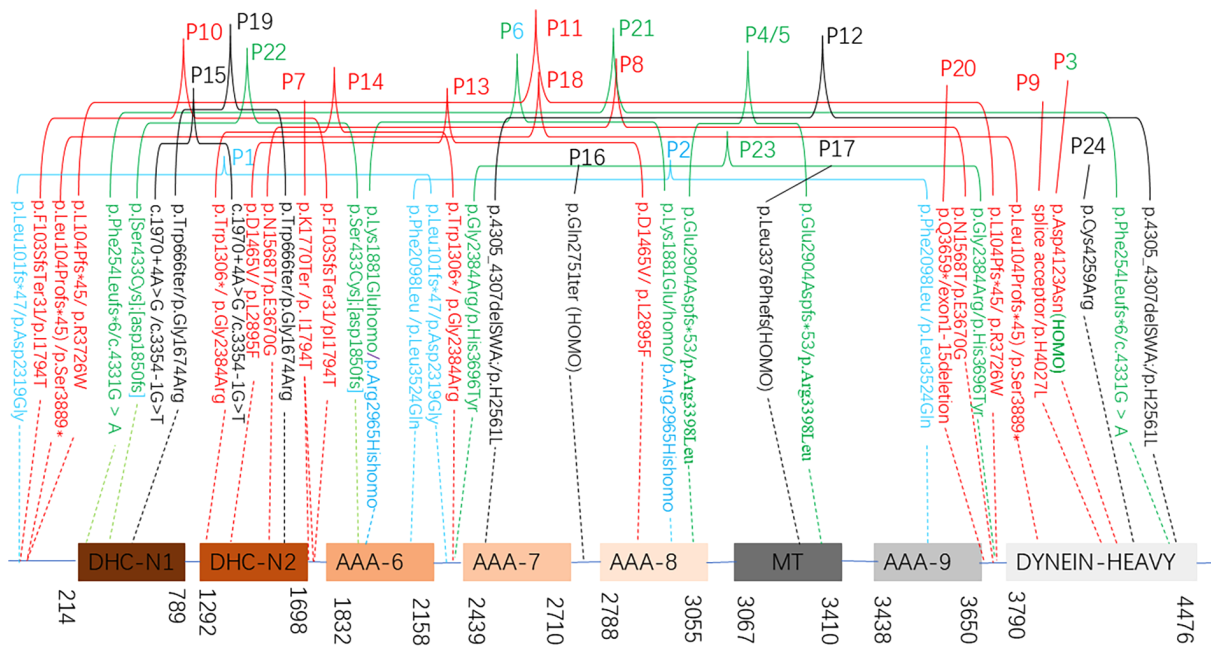

Supplement: Supplementary file 1 [file downloadSupplementary]
